# Supplementary material
Source: Springer Nature journal article supplement (https://www.springermedizin.de/resource/supplementary/12885_2011_2997_MOESM12_ESM.pdf/9462498)

**A.**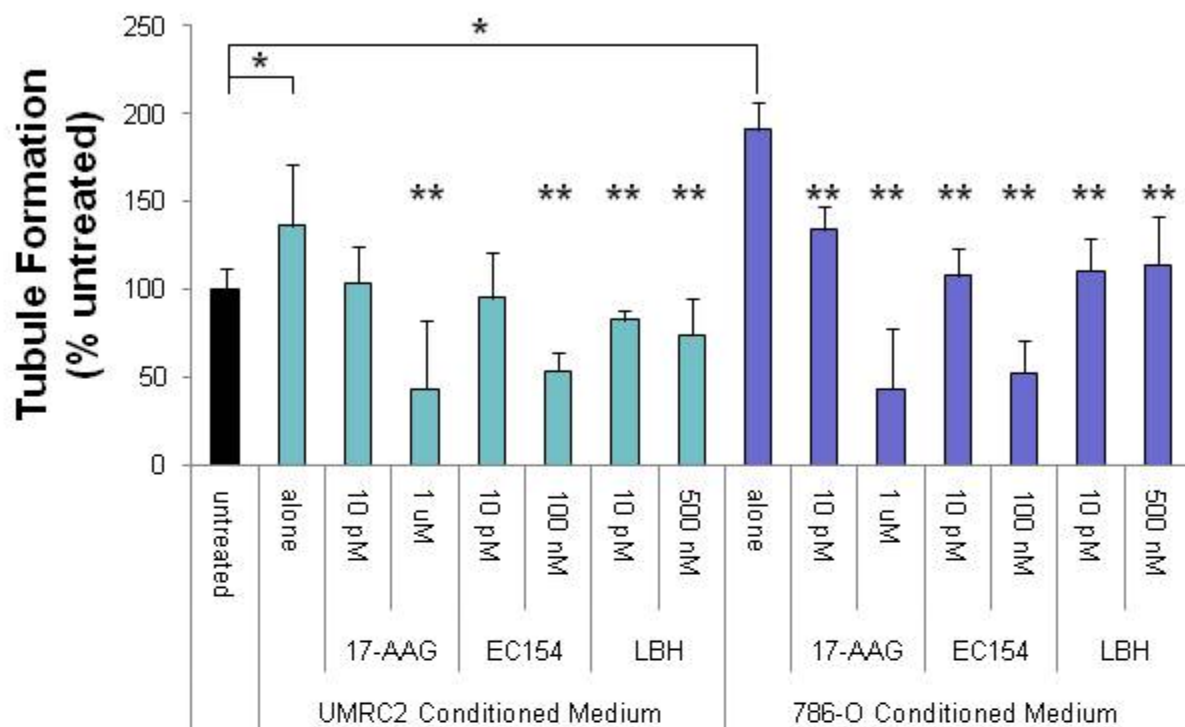**B.**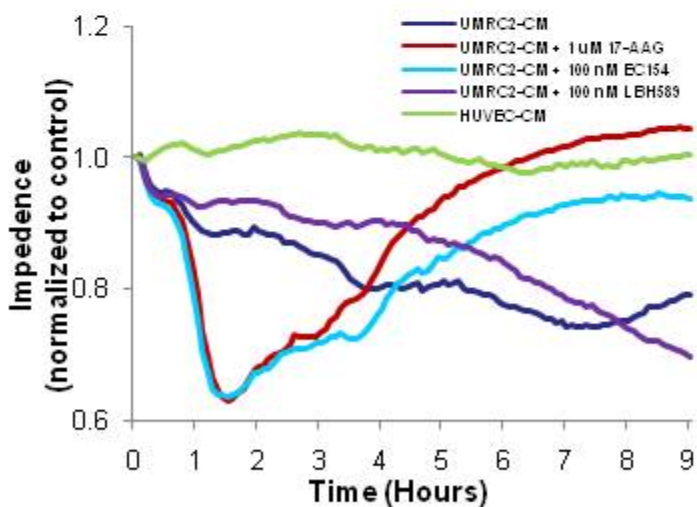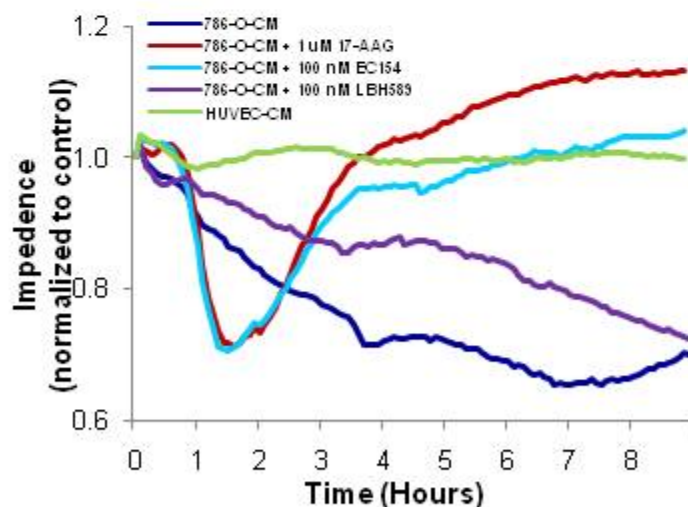

Supplement: MOESM12 [file 9462498]
